# Supplementary material
Source: publisher figshare collection journal article supplement (https://geolsoc.figshare.com/ndownloader/files/14138126)
Supplement: Supplementary file 1 [file 14138126]

	Al	FM	CNK	Normalised total			Al	Fe	Si	Normalised total
A - Modern - A-CNK-FM						B - Modern - Al-Si-Fe
Tunnels unaltered	26.6	42.4	31	100			19.3	22.8	57.9	100
Tunnels residue	14.2	56.8	29	100			12.9	48	39.1	100
Trough residue	21.7	59.2	19.1	100			19.9	48.7	31.4	100
Trough unaltered	23.4	48	28.6	100			22.2	40.1	37.7	100
Cuts residue	53.1	11.8	35.2	100			40.2	7.9	51.9	100
Cuts unaltered	57.3	3.3	39.4	100			44.1	2.4	53.6	100
Elongate tracks and borings - residue	48.1	13	38.9	100			38.7	12	49.3	100
Elongate tracks and borings - unaltered	57.1	2.2	40.8	100			44.4	1.5	54.1	100
Asym. hole residue	54.5	3.1	42.4	100			43.8	2.3	53.9	100
Elongate track - residue	48.3	20.9	30.8	100			38.3	15.8	45.9	100
Cuts residue	52.5	16.5	31	100			43.1	13.3	43.5	100
Root pitting	16.6	59.9	23.5	100			15.7	51.5	32.8	100
Average unaltered	57.2	2.8	40	100			44.1	1.8	54.1	100
Asym. hole residue	54.1	3.2	42.8	100			44.4	2.6	53	100
Elongate track residue	15	43.7	41.3	100			16.1	42.9	41	100
Average track mark*	53.4	5.4	41.2	100						0
Average Fe nodule - bio-precipitation*	0.6	98.7	0.7	100			0.6	98.2	1.2	100
Average unaltered areas*	9.2	42.7	48.2	100			18.1	30	51.9	100
Average EPS*	2.5	79.4	18.1	100			0.3	98.3	1.4	100
Average hypha*	3.3	74.7	22	100			4	84	12.1	100
* Average of 5 points per feature	Al = Aluminium		FM = Iron + Magnesium		CNK = Calcium + Sodium + Potassium
C - ORS - A-CNK-FM	Al	FM	CNK	Normalized total		D - ORS - A-CNK-FM	Al	Fe	Si	Normalised total
Asym. hole	43.8	40.6	15.6	100			6.1	4.3	89.6	100
Asym. hole	59.3	33.3	7.4	100			5.2	2.3	92.5	100
Asym. hole	50	37.5	12.5	100			2.9	1.8	95.3	100
Asym. hole	35.7	50	14.3	100			4.1	4.9	90.9	100
Asym. hole	38.3	40.4	21.3	100			6	4.4	89.6	100
Asym. hole	36	55.3	8.8	100			18.7	22.8	58.4	100
Elongate track	0	94.8	5.2	100			0	88.5	11.5	100
Elongate track	9.9	84	6.1	100			8.3	69	22.7	100
Cut	31.3	68.8	0	100			1.8	3.6	94.5	100
Cut	16.7	66.7	16.7	100			0.3	1.3	98.4	100
Track mark	30	70	0	100			1.1	2.7	96.2	100
Mud/claystone matrix	21.9	68.8	9.4	100			15.2	43.5	41.3	100
Mud/claystone matrix	27.4	63	9.6	100			18.5	38	43.5	100
Mud/claystone matrix	50.6	34.1	15.2	100			36.1	10	53.9	100
Mud/claystone matrix	54	21.8	24.1	100			36.4	10.9	52.7	100
Mud/claystone matrix	44.9	48.3	6.8	100			34.5	20.6	44.9	100
Mud/claystone matrix	51.9	33.3	14.8	100			12.3	4.8	82.9	100
Mud/claystone matrix	47.1	44.1	8.8	100			16.3	8.2	75.5	100
Mud/claystone matrix	40.1	52.8	7	100			32.6	19.4	48	100
Mud/claystone matrix	28.4	61.7	9.8	100			13.9	28.8	57.3	100
Mud/claystone matrix	37.6	58	4.5	100			27.4	14.4	58.1	100
Mud/claystone matrix	41.2	41.2	17.4	100			18.3	14.8	66.9	100
Mud/claystone matrix	41.5	48.8	9.8	100			13.1	8.1	78.8	100
Mud/claystone matrix	41.3	49.6	8.9	100			31.6	27.8	40.7	100
Mud/claystone matrix	32.1	53.7	13.9	100			12.7	19.9	67.4	100
Mud/claystone matrix	44.2	37.1	18.3	100			22.4	15.7	61.9	100
Elongate Track 2							22	18.3	59.7	100
Elongate Track 2							41.7	25	33.3	100
Elongate Track 2							26.9	27.1	46	100
Asym. holes 2							26.1	23.9	50	100
Asym. holes 2							22.4	33.2	44.4	100
Supplemental B: SEM-EDS data corresponding to plots in Figure 4.
